# Supplementary material for: The Association between Urine N-Glycome and Prognosis after Initial Therapy for Primary Prostate Cancer
Source: MDPI journal article supplement (doi:10.3390/biomedicines12051039), 2024-05-08
Supplement: s1 [file s1]

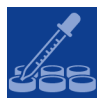

# The Association between Urine N-Glycome and Prognosis after Initial Therapy for Primary Prostate Cancer

## 1. Supplementary figures

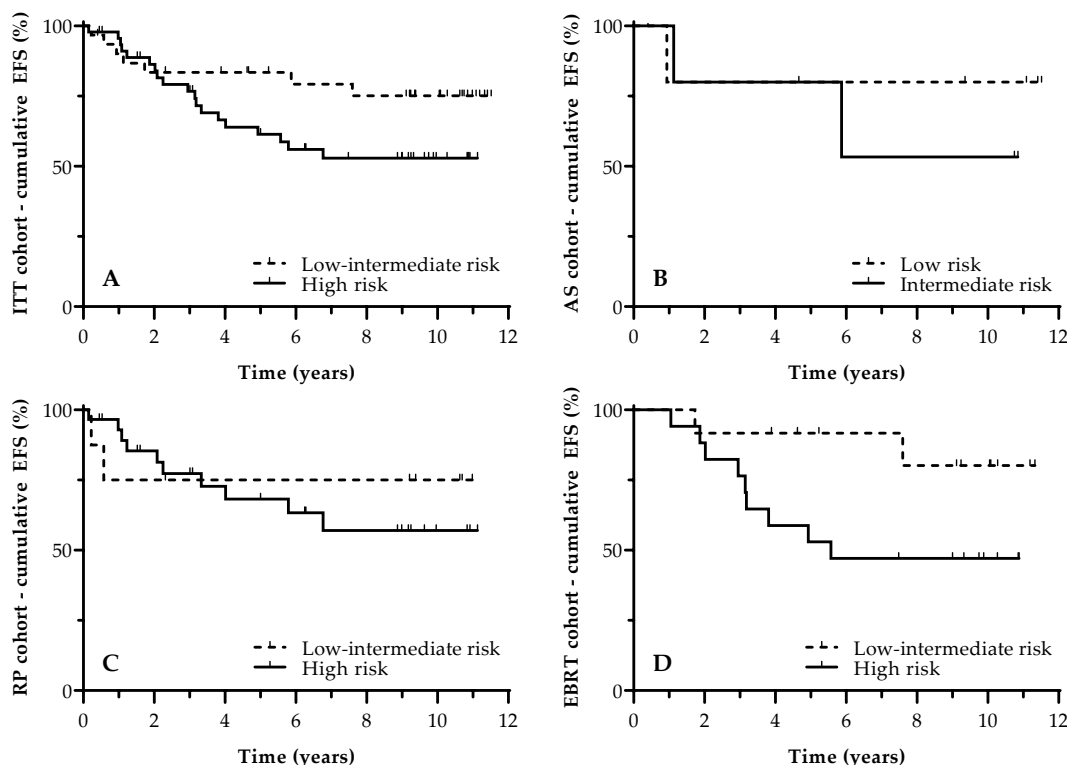

**Figure S1.** Kaplan-Meier EFS curves for D'Amico Risk Classification for PCa. Y-axis depicts cumulative EFS (%), X-axis depicts survival time in years. EFS curves are demonstrated for (A) ITT cohort ( $HR_{\text{high risk}} = 1.97$  [0.91–4.29];  $P = 0.0874$ ), (B) AS cohort ( $HR_{\text{intermediate risk}} = 2.00$  [0.21–19.5];  $P = 0.5492$ ), (C) RP cohort ( $HR_{\text{high risk}} = 1.43$  [0.37–5.51];  $P = 0.6066$ ), and (D) EBRT cohort ( $HR_{\text{high risk}} = 9.34$  [2.48–35.2];  $P = 0.0010$ ). Censored data are indicated in the graph. AS, active surveillance; EBRT, external beam radiotherapy; ITT, intention-to-treat; EFS, progression-free survival; RP, radical prostatectomy.

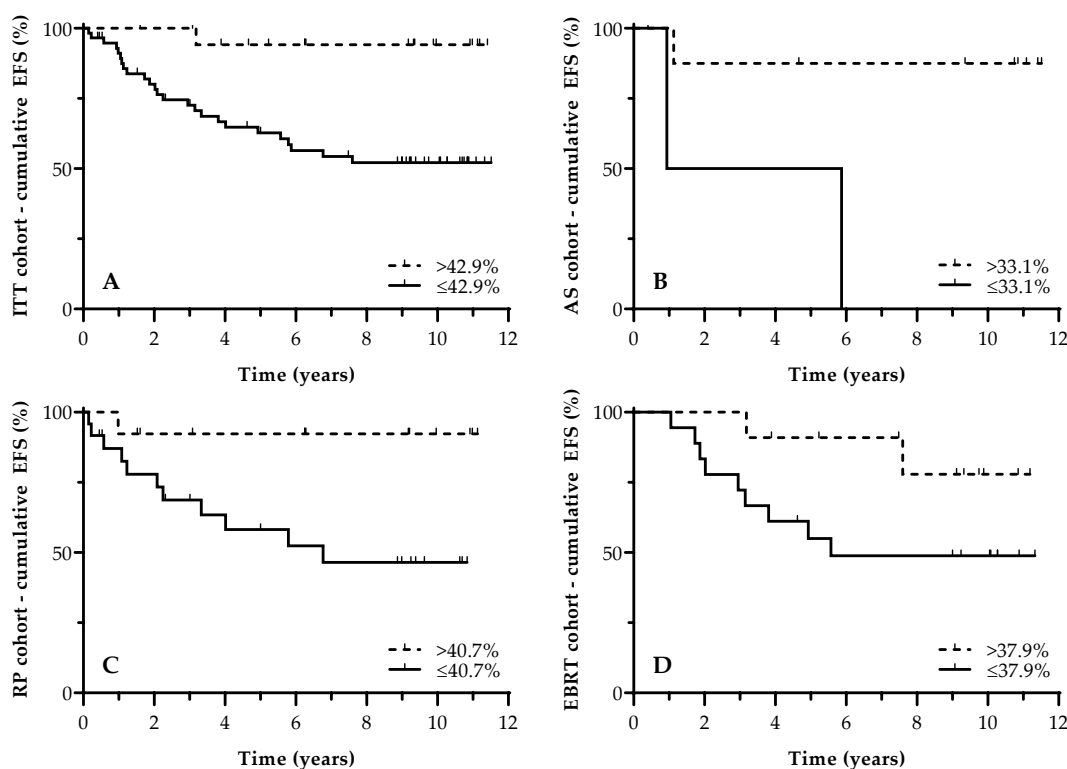

**Figure S2.** Kaplan-Meier EFS curves for 2AFc/MA. Y-axis depicts cumulative EFS (%), X-axis depicts survival time in years. EFS curves are demonstrated for (A) ITT cohort ( $HR_{>42.9} = 0.29$  [0.12-0.67];  $P = 0.0039$ ), (B) AS cohort ( $HR_{>33.1} = 0.02$  [0.00-0.41];  $P = 0.0123$ ), (C) RP cohort ( $HR_{>40.7} = 0.27$  [0.08-0.85];  $P = 0.0260$ ), and (D) EBRT cohort ( $HR_{>37.9} = 0.38$  [0.11-1.27];  $P = 0.1168$ ). Censored data are indicated in the graph. 2AFc/MA, ratio of fucosylated biantennary structures / total of multiantennary structures; AS, active surveillance; EBRT, external beam radiotherapy; ITT, intention-to-treat; EFS, progression-free survival; RP, radical prostatectomy.

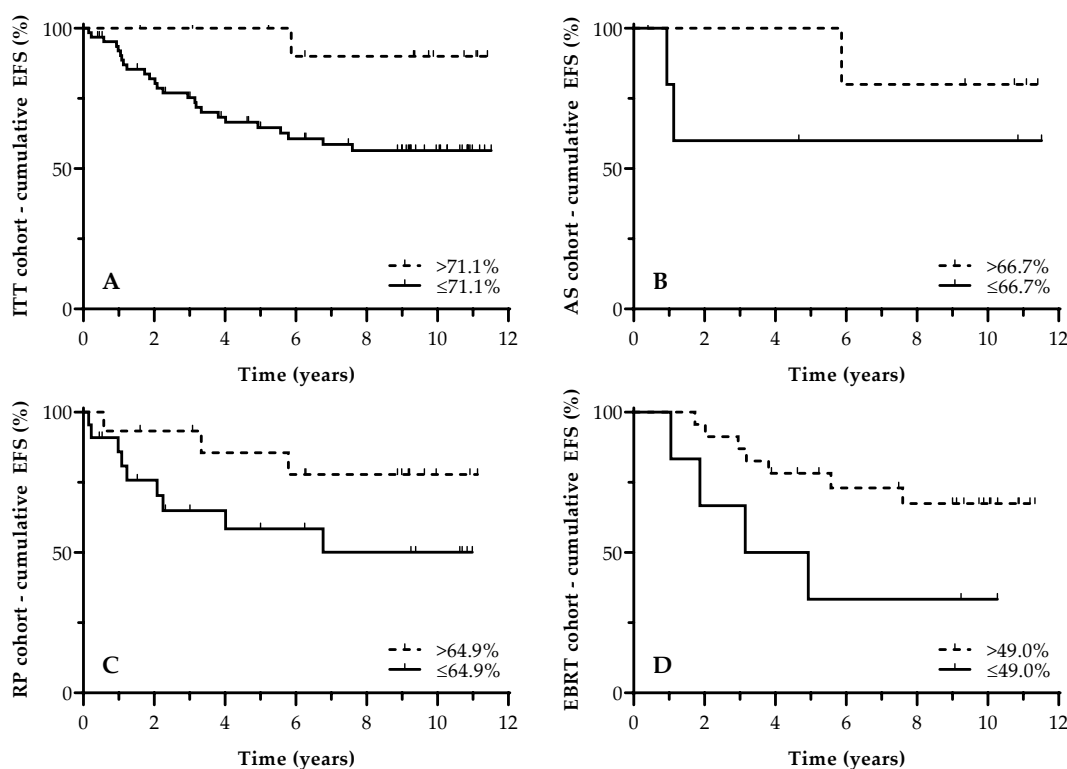

**Figure S3.** Kaplan-Meier EFS curves for Fc/MA. Y-axis depicts cumulative EFS (%), X-axis depicts survival time in years. EFS curves are demonstrated for (A) ITT cohort ( $HR_{>71.1} = 0.36$  [0.14-0.93];  $P = 0.0356$ ), (B) AS cohort ( $HR_{>66.7} = 0.33$  [0.03-3.47];  $P = 0.3578$ ), (C) RP cohort ( $HR_{>64.9} = 0.39$  [0.12-1.22];  $P = 0.1045$ ), and (D) EBRT cohort ( $HR_{>49.0} = 0.21$  [0.04-1.06];  $P = 0.0589$ ). Censored data are indicated in the graph. AS, active surveillance; EBRT, external beam radiotherapy; Fc/MA, ratio of fucosylated structures / total of multiantennary structures; ITT, intention-to-treat; EFS, progression-free survival; RP, radical prostatectomy.

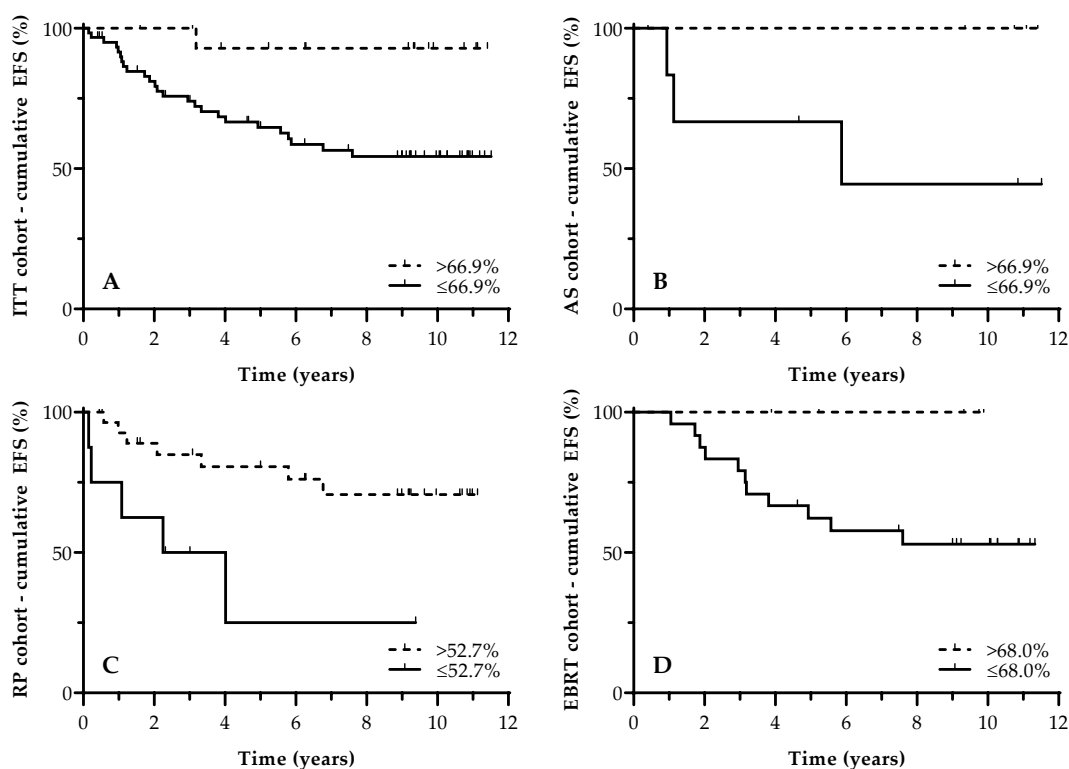

**Figure S4.** Kaplan-Meier EFS curves for 2AFc/2T. Y-axis depicts cumulative EFS (%), X-axis depicts survival time in years. EFS curves are demonstrated for (A) ITT cohort ( $HR_{>66.9} = 0.33$  [0.13-0.80];  $P = 0.0144$ ), (B) AS cohort ( $P = 0.0979$ ), (C) RP cohort ( $HR_{>52.7} = 0.12$  [0.02-0.60];  $P = 0.0097$ ), and (D) EBRT cohort ( $P = 0.1000$ ). Censored data are indicated in the graph. 2AFc/2T, ratio of fucosylated biantennary structures / total of biantennary structures; AS, active surveillance; EBRT, external beam radiotherapy; ITT, intention-to-treat; EFS, progression-free survival; RP, radical prostatectomy.
